# Supplementary material for: Regulating the thermal expansion of a [FePt(CN)4] layer by axial coordination and dimensional reduction
Source: Royal Society of Chemistry journal article supplement (doi:10.1039/d4dt01205d), 2024-01-01
Supplement: d4dt01205d1.pdf [file d4dt01205d1.pdf]

## Supporting Information

### Regulating Thermal Expansion of [FePt(CN)<sub>4</sub>] Layer by Axial Coordination and Dimensional Reduction

Rui Ma,<sup>δa</sup> Liang Chen,<sup>δa</sup> Zhanning Liu,<sup>\*b</sup> Kun Lin,<sup>a</sup> Qiang Li,<sup>a</sup> Weihua Ji,<sup>c</sup> Hankun Xu,<sup>a</sup> Xin Chen,<sup>a</sup> Jinxia Deng<sup>a</sup> and Xianran Xing<sup>\*a</sup>

<sup>a</sup> Beijing Advanced Innovation Center for Materials Genome Engineering, Institute of Solid State Chemistry, University of Science and Technology Beijing, Beijing, 100083, China

<sup>b</sup> School of Materials Science and Engineering, Shandong University of Science and Technology, Qingdao, 266590, China

<sup>c</sup> College of Materials Science and Engineering, Taiyuan University of Technology, Taiyuan, 030024, China

E-mail: xing@ustb.edu.cn; znliu@sdust.edu.cn

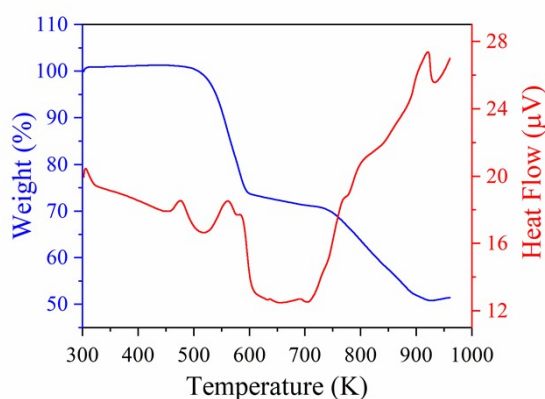

**Figure S1.** Thermogravimetric Differential Scanning Calorimetry (TG-DSC) curve for FePt<sub>py</sub>.

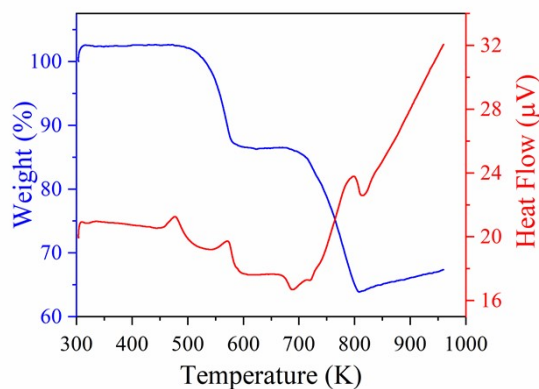

**Figure S2.** Thermogravimetric Differential Scanning Calorimetry (TG-DSC) curve for FePt<sub>pyz</sub>.

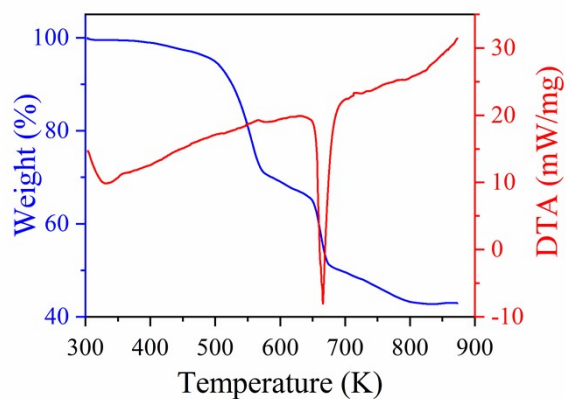

**Figure S3.** Thermogravimetric curve for FePt<sub>pyz</sub>·I.

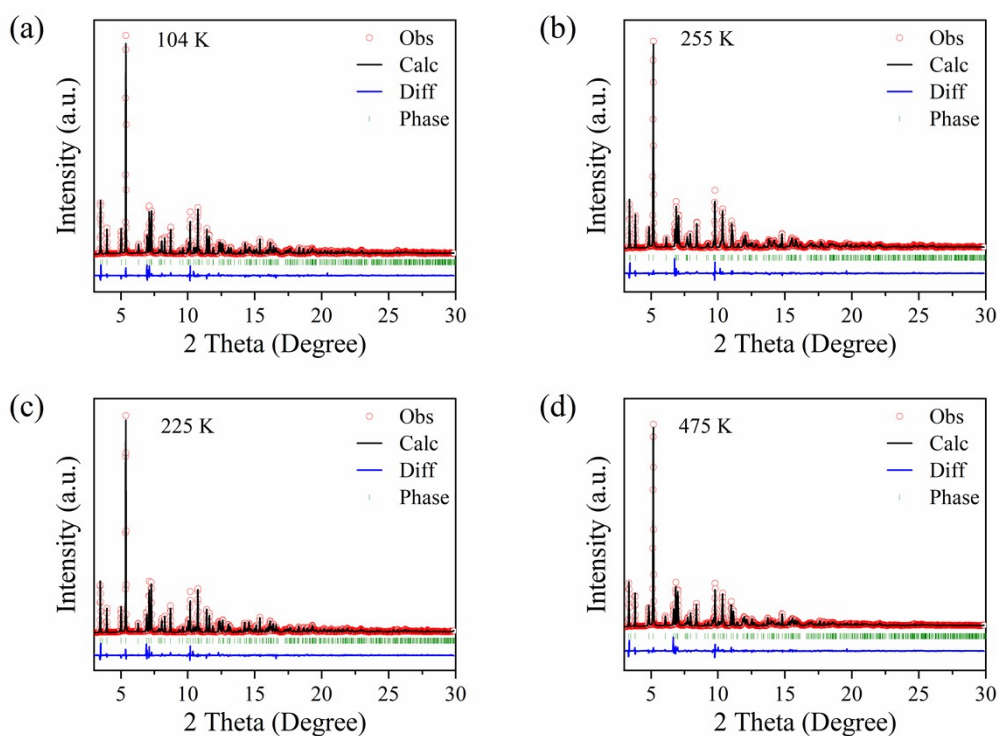

**Figure S4.** Rietveld Refinement to the synchrotron powder X-ray diffraction pattern of FePt<sub>py</sub> at (a) 104 K and (c) 225 K in LS state and (b) 255 K and (d) 475 K in HS state.

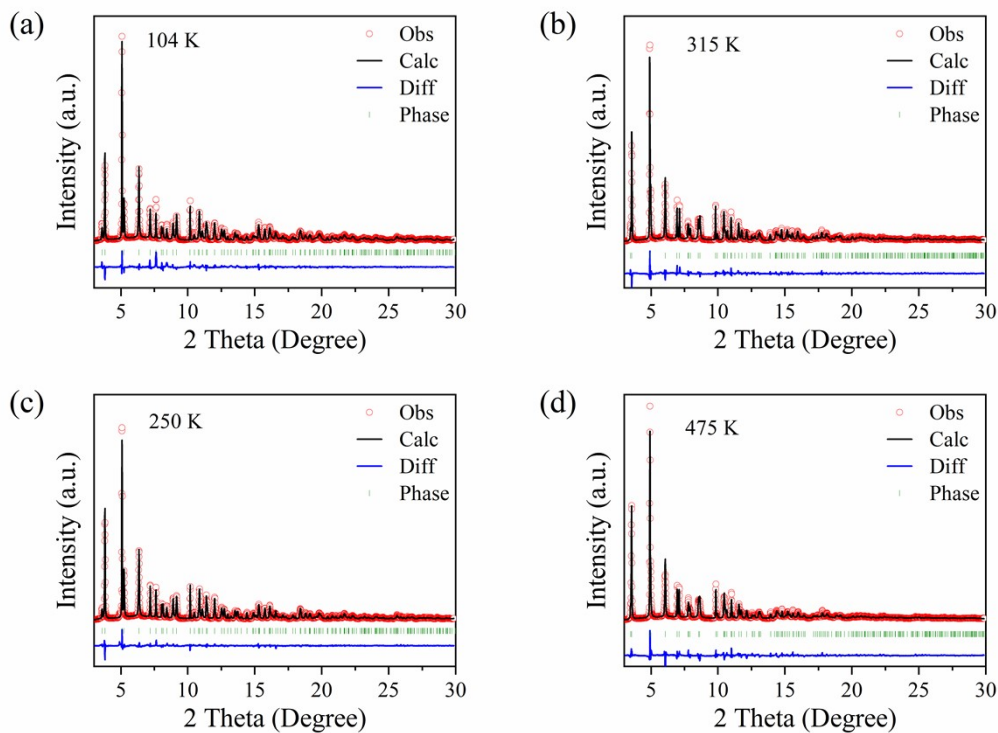

**Figure S5.** Rietveld Refinement to the synchrotron powder X-ray diffraction pattern of FePt\_pyz at (a) 104 K and (c) 250 K in LS state and (b) 315 K and (d) 475 K in HS state.

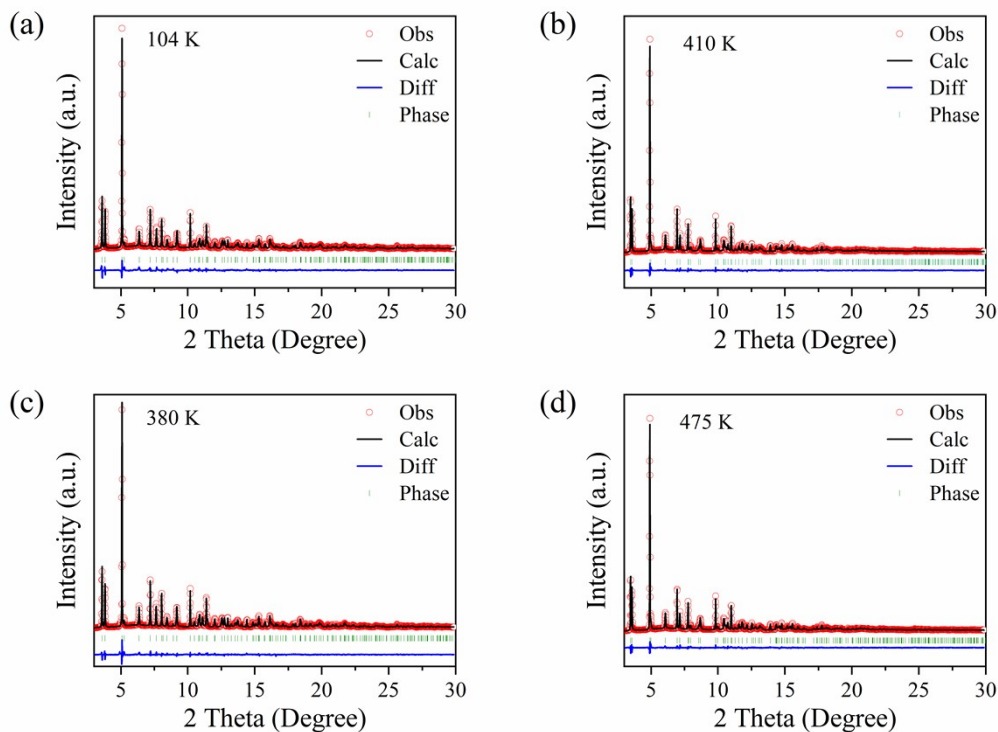

**Figure S6.** Rietveld Refinement to the synchrotron powder X-ray diffraction pattern of FePt\_pyz-I, at (a) 104 K and (c) 380 K in LS state and (b) 410 K and (d) 475 K in HS state.

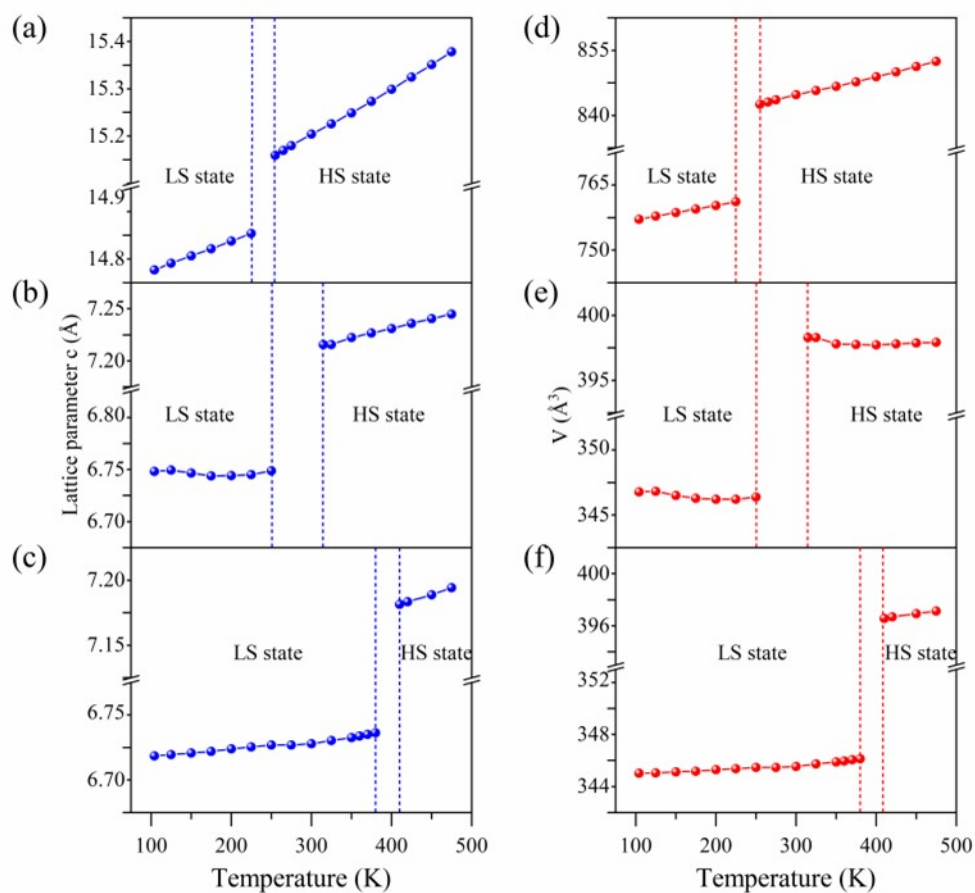

**Figure S7.** Temperature dependence of cell parameters  $c$  and  $V$  of FePt<sub>py</sub> (a, d), FePt<sub>pyz</sub> (b, e), and FePt<sub>pyz</sub>·I (c, f)

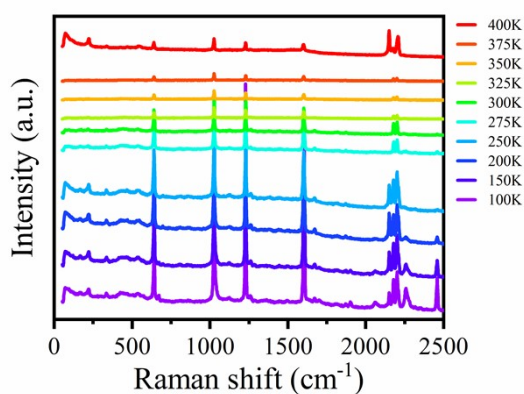

**Figure S8.** Variable temperature Raman spectra of FePt<sub>pyz</sub>.

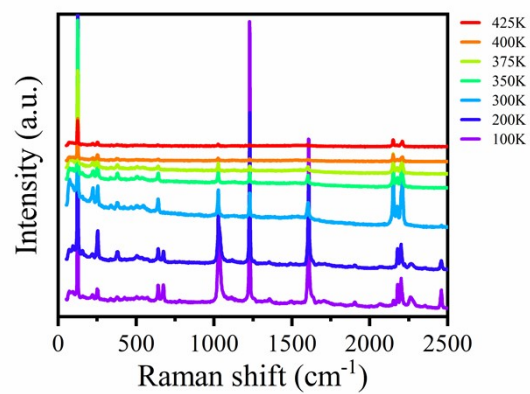

**Figure S9.** Variable temperature Raman spectra of FePt<sub>2</sub>(pyz)<sub>2</sub>·I.
